1                   **Modular development enables rapid design of media for alternative hosts**

2  
3  
4  
5 Andrew M. Biedermann<sup>1,2</sup>, Isabella R. Gengaro<sup>1,2</sup>, Sergio A. Rodriguez-Aponte<sup>1,2</sup>, Kerry R.  
6 Love<sup>1,2</sup>, J. Christopher Love<sup>1,2</sup>

7  
8  
9  
10 <sup>1</sup>Department of Chemical Engineering, Massachusetts Institute of Technology, Cambridge,  
11 Massachusetts 02139, United States

12 <sup>2</sup>The Koch Institute for Integrative Cancer Research, Massachusetts Institute of Technology,  
13 Cambridge, Massachusetts 01239, United States

14  
15  
16  
17  
18  
19  
20  
21 \*Correspondence to: [clove@mit.edu](mailto:clove@mit.edu)

22  
23  
24  
25  
26  
27 Target journal: Biotechnology & Bioengineering  
28 Article (<15 double-spaced pages of text and no more than 10 figures/tables)

29  
30 **Keywords:** Media development; media blending; *Pichia pastoris*; alternative hosts; automation

31  
32

### 33 **Abstract**

34           Developing media to sustain cell growth and production is an essential and ongoing  
35 activity in bioprocess development. Modifications to media can often address host or product-  
36 specific challenges, such as low productivity or poor product quality. For other applications,  
37 systematic design of new media can facilitate the adoption of new industrially relevant  
38 alternative hosts. Despite manifold existing methods, common approaches for optimization often  
39 remain time and labor intensive. We present here a novel approach to conventional media  
40 blending that leverages stable, simple, concentrated stock solutions to enable rapid  
41 improvement of measurable phenotypes of interest. We applied this modular methodology to  
42 generate high-performing media for two phenotypes of interest: biomass accumulation and  
43 heterologous protein production, using high-throughput, milliliter-scale batch fermentations of  
44 *Pichia pastoris* as a model system. In addition to these examples, we also created a flexible  
45 open-source package for modular blending automation on a low-cost liquid handling system to  
46 facilitate wide use of this method. Our modular blending method enables rapid, flexible media  
47 development, requiring minimal labor investment and prior knowledge of the host organism, and  
48 should enable developing improved media for other hosts and phenotypes of interest.

## 49 Introduction

50 Achieving high volumetric productivities of biologic drugs in cultivation is a key step in  
51 advancing candidate biologic drugs. The outcome of this effort ultimately impacts  
52 manufacturing costs as well as readiness for transitioning clinical-stage development (Love,  
53 Love, & Barone, 2012). The development of standard, chemically defined media for established  
54 manufacturing hosts, such as CHO, has made such transitions efficient for monoclonal  
55 antibodies by achieving high biomass accumulation, cell viability, operational consistency, and  
56 specific productivities, streamlining development efforts (McGillicuddy, Floris, Albrecht, &  
57 Bones, 2018; Rodrigues, Costa, Henriques, Azeredo, & Oliveira, 2012). Nonetheless, optimizing  
58 productivity or quality attributes for a specific product often still requires further refinement of  
59 media (Ritacco, Wu, & Khetan, 2018). Such development may require evaluating dozens of  
60 variants derived from a common standard formulation to address the specific challenges  
61 encountered (Gagnon et al., 2011; Loebrich et al., 2019). Media development for entirely new  
62 biomanufacturing technologies, such as alternative hosts (Matthews, Kuo, Love, & Love, 2017a)  
63 or new product modalities (Lu et al., 2016), may also require new formulations or extensive  
64 optimizations due to limited prior knowledge.

65 Common approaches to develop a medium to optimize a phenotype of interest are often  
66 labor intensive, low throughput, or rely heavily on extensive analytical capacity (Galbraith,  
67 Bhatia, Liu, & Yoon, 2018). For example, analysis of residual media after cultivation requires  
68 extensive capabilities for analytical characterization and prior experience with the manufacturing  
69 host to identify potentially limiting or toxic media components (Mohmad-Saberi et al., 2013;  
70 Pereira, Kildegaard, & Andersen, 2018). As a result, optimizations can be slow and iterative.  
71 Furthermore, for an alternative host such as *Komagataella phaffii* (formerly known as *Pichia*  
72 *pastoris*), there is substantially less, if any, prior knowledge available to establish profiles for  
73 residual components in media after fermentation. Other analytical techniques like RNA-seq  
74 combined with methods for reporter metabolite analysis can guide media optimization, to

75 generate testable hypotheses regarding beneficial modifications to media (Matthews et al.,  
76 2017a). Such genome-scale approaches, however, require prior host-specific knowledge, such  
77 as well-annotated genomes, and are still limited by slow iteration and labor-intensive  
78 preparations of new media to test the hypotheses generated from computational analyses.

79         Alternative strategies for blending basal components for media allow linear combinations  
80 of existing media to explore many variations rapidly (Jordan, Voisard, Berthoud, & Tercier,  
81 2013). While this approach avoids slow iterative analyses, the typical experiment is labor  
82 intensive to perform, often requiring independent preparations of over a dozen stock media to  
83 combine (Rouiller et al., 2013). Similar to analytical-based approaches for optimization, the  
84 selected variations of media are simultaneously guided and constrained by prior experience and  
85 media designs, which may limit the breadth of components examined (Kennedy & Krouse,  
86 1999). For less established hosts with fewer available formulations of media, media blending  
87 may also require fully *de novo* formulations for initial studies. Further complicating such designs,  
88 different and new components for media can present challenges in solubility or unanticipated  
89 interactions with other elements in the formulations (Ritacco et al., 2018). New approaches to  
90 blending could, however, enable fast, flexible experimentation and minimize the time, labor, and  
91 analytical development needed initially to optimize media for new applications and phenotypes.

92         Here, we present a novel and generalizable approach for the modular development of  
93 media and demonstrate its use to create optimized media for two different phenotypes—cellular  
94 growth and recombinant expression of a protein (as measured by the secreted heterologous  
95 protein titer) from *Pichia pastoris*. Our approach comprises two modular parts for blending and  
96 optimization. We determined that a set of simple concentrated stock solutions constructed in  
97 defined modules could generate many media by blending or dilution. We then automated a  
98 simple, inexpensive liquid handling system (Opentrons OT-2) to enable high-throughput  
99 screening for the effects of diverse media on a phenotype of interest in milliliter-scale batch  
100 cultures. To maximize the benefit of this automated blending, we also developed an algorithmic

101 framework for systematic modular media optimization, beginning from a simple minimal media  
102 (here a YNB-based one). This framework provides insights pertaining to key media components  
103 during stages of optimization, as well as overall mapping of the design space for the media. In  
104 the examples presented here, the resulting defined media developed with this strategy  
105 outperformed commonly used BMGY and BMMY complex formulations for biomass  
106 accumulation and secreted heterologous protein production.

107

## 108 **Materials and Methods**

### 109 *Strains and cultivation conditions*

110 Media for evaluating biomass accumulation were developed using a previously  
111 described strain expressing G-CSF under control of the pAOX1 promoter (Crowell et al., 2020).  
112 24-well plate screens were conducted as described previously, except cells were grown on a  
113 labForce shaker and were only sampled 24 hours after inoculation (Matthews et al., 2017a).  
114 BMGY, BMMY, and RDM media were formulated as described previously for shake flasks  
115 (Matthews et al., 2017a). All cultivations were inoculated from a working cell bank at an initial  
116 cell density of 0.1 OD/mL. For each working cell bank, cells grown in 1 L shake flasks with a 200  
117 mL working volume of RDM were harvested during exponential growth (4-5.5 OD/mL) via  
118 centrifugation at 1500 rcf for 4 minutes at 23 °C and resuspended in an equal volume mixture of  
119 RDM and 50 v/v% glycerol. This mixture was then distributed into 700 µL aliquots and stored at  
120 -80 °C, resulting in a cell density of ~30 OD/mL for the cell bank.

121 Media for evaluating enhanced production were developed using a strain expressing a  
122 rotavirus-derived subunit vaccine candidate, P[8], under the control of the pAOX1 promoter  
123 described previously (Dalvie et al., 2020). Biomass accumulation proceeded for 24 hours; cells  
124 reached an initial induction density of ~20 OD/mL. Cultures were then exchanged into  
125 production media and allowed to produce protein for an additional 24 hours. Supernatant was  
126 harvested by centrifugation at 1500 rcf for 4 minutes at 23 °C and filtered using a Captiva 96

127 well 0.2  $\mu\text{m}$  filter plate (Agilent Technologies, Santa Clara, CA) prior to titer measurement by  
128 RP-UHPLC.

129 Media components and supplements were purchased from Sigma-Aldrich, St. Louis,  
130 MO, unless otherwise indicated in the supporting information. A table of supplement and stock  
131 solutions with screening concentrations is also included in the supporting information. During  
132 modular optimization, all media were prepared in high throughput using an Opentrons OT-2  
133 liquid handler (Opentrons, Brooklyn, NY, software version  $\geq 3.16.1$ ) using Openblend. Modular  
134 media blending code and instructions for setup and operation are provided in the Openblend  
135 package (<https://github.mit.edu/lovelab/openblend>). For consistency, media used in final head-  
136 to-head comparisons were prepared in bulk and filter sterilized through a 0.2  $\mu\text{m}$  benchtop filter.

137

### 138 *Analytical procedures*

139 Biomass was measured by optical density at 600 nm as described previously (Matthews  
140 et al., 2017a). An Agilent Bravo liquid handler was used to dilute samples prior to  
141 measurements of OD into the Tecan Infinite M200 Pro plate reader.

142 Reverse phase ultra-high performance liquid chromatography (UHPLC) analysis was  
143 performed on Agilent 1290 Infinity II UHPLC system controlled using OpenLab CDS software  
144 (Agilent Technologies, Santa Clara, CA). The concentration of protein was determined using a  
145 Poroshell 120 SB-Aq column (2.1 x 50 mm, 1.9 $\mu\text{m}$ ) operated at 1.0 mL/min and 70  $^{\circ}\text{C}$  (Agilent  
146 Technologies, Santa Clara, CA). Buffer A was 0.1% (v/v) TFA in water and buffer B was 0.1%  
147 (v/v) TFA, 0.5% (v/v) water in ACN. A gradient was performed as follows: 30% B for 1 min., 30-  
148 40% B over 3 min., 40-90% B over 0.5 min., 90% B for 0.5 min., 90-30%B over 0.5 min., and  
149 30% for 1 min.; total method run time was 6.5 minutes. Sample injection volumes were 50 $\mu\text{L}$ . A  
150 diode array detector was set for absorbance detection at 214nm. Data analysis was completed  
151 using OpenLab CDS Data Analysis (Agilent Technologies, Santa Clara, CA).

152           Statistical analysis and DOE design was conducted using JMP (SAS Institute, Cary NC).  
153    Quadratic models were fitted using effect screening and non-significant terms (adjusted p-value  
154    > 0.01) were eliminated sequentially in order of decreasing adjusted p-value to avoid overfitting.  
155    Data was plotted using Prism 8.4.0 (GraphPad Software, San Diego, CA).

156

157

158

## 159    **Results**

### 160    *Design of approach for modular media blending*

161           We sought to develop an approach capable of identifying important, beneficial  
162    modifications for media tailored to a given phenotype of interest. We reasoned that key  
163    requirements for such an approach would be that it is fast and automatable, with minimal  
164    dependence on complex analytical assay development. Such features would enable routine  
165    application to any measurable phenotype of interest. In general, media blending allows both  
166    speed and low analytical complexity. We aimed to retain these features while minimizing the  
167    labor and constraints on compositions imposed by linear combinations of fully formed and  
168    unique media. We reasoned that diverse and flexible blends of media could be created by  
169    defining simple concentrated stock solutions as basic modules to combine further. These  
170    modules would comprise individual components or common subsets of components with  
171    compatible solubilities (e.g. YNB). If media components could be formulated in concentrated  
172    stock solutions that could be stored stably over time, then the components could be routinely  
173    and interchangeably combined and diluted to the desired final concentrations. This approach  
174    would yield a broadly applicable modular strategy for media blending amenable to conventional  
175    liquid handling automation.

176           To test the feasibility of this approach, we first assessed whether many common media  
177    components could be formulated in concentrated stable aqueous stock solutions. Using the

178 CHO medium eRDF as a reference, we estimated the solubility of each component of this  
179 medium, using data from AqSolDB as well as other online sources (Combs, 2012; FSA Panel  
180 on Additives and Products or Substances used in Animal Feed (FEEDAP), 2011; Ritacco et al.,  
181 2018; Schnellbaecher, Binder, Bellmaine, & Zimmer, 2019; Sorkun, Khetan, & Er, 2019;  
182 Yamamoto & Ishihara, n.d.). We compared the estimated solubility of each media component to  
183 its concentration in eRDF and found that, individually, most media components are soluble at  
184 levels >10x higher than their eRDF concentration (**Figure 1A**). The existence of a wide range of  
185 commercially available concentrated supplements further supports this result: >50x  
186 concentrated solutions of amino acids, vitamins, lipids, and trace metal supplements are  
187 common and commercially available.

188 Next, we used the product information of commercially available supplements, literature  
189 sources, and inspection to estimate the percentage of eRDF media components that could be  
190 stored in stable solutions for >6 months. We estimated that over 75% of eRDF components met  
191 this criterion (**Figure 1B**). To address stability challenges caused by less stable components,  
192 we reasoned that less stable components or supplements, such as vitamins, could be prepared,  
193 aliquoted, and stored frozen for long-term storage (Schnellbaecher et al., 2019); these aliquots  
194 could then be thawed and used within a defined period to mitigate component instability and  
195 enable their integration into our modular blending strategy. Together, these solubility and  
196 stability data suggested that a modular approach to media development could be defined in this  
197 way to accommodate a range of new formulations easily.

198 We next automated the process for constructing media, using the Opentrons OT-2. We  
199 chose this liquid handler due to its low cost, reliability, and compatibility with simple formats for  
200 data input, such as Excel spreadsheets. We then created an open-source Python package,  
201 named Openblend, which simplified the media construction process by handling routine  
202 experimental design and execution steps (Figure 1C). Openblend creates an experimental  
203 design spreadsheet, specifying the number of 24 well plates, the desired media composition of



204 each well, and stock solution names and concentrations. The script then checks the feasibility  
205 of the experimental design, ensuring that the total volume of each well will not exceed the target  
206 volume and avoiding the addition of sub-microliter stock solution volumes. If the design passes  
207 this assessment, the script then outputs a new spreadsheet containing the setup for the OT-2  
208 deck and required volumes of stock solutions, providing a user with instructions on how to setup  
209 the OT-2 liquid handler. We found that our typical time to execute this script, setup the OT-2  
210 and initiate plate building was ~15 minutes, and the time for the automated steps was about two  
211 hours.

212 Finally, we defined a modular approach for optimization to effectively leverage the  
213 Openblend tool (**Figure 1D**). Beginning from an initial basal medium, improved media are  
214 constructed through successive rounds of optimization. In each round, a library of media  
215 components and supplements are screened to identify beneficial additives. These additives are  
216 then screened in combination and over a range of concentrations to further optimize the  
217 performance of the medium. Each modular addition and optimization of additives can be guided  
218 simply by measurements of the phenotype of interest (e.g. biomass accumulation). This greedy  
219 approach to multi-dimensional optimization could continue iteratively until the resulting media  
220 met desired specifications, all available media components were explored, or no additional  
221 gains in performance realized.

222

### 223 *Application to Developing a Medium for Biomass Accumulation*

224 To assess the utility of this blending-based approach, we next aimed to identify and  
225 optimize the concentration of media components beneficial for rapid biomass accumulation of *P.*  
226 *pastoris* in batch cultivation. We previously described a rich defined medium (RDM) (Matthews  
227 et al., 2017a), capable of high growth rates during biomass accumulation. One challenge  
228 encountered with this formulation, however, was that precipitates can form at higher pH values  
229 that require filtering during bulk preparations. Nonetheless, this medium provided a relevant

230 comparison for assessing the medium realized with our new approach due to its prior  
231 demonstrated benefits relative to complex media. Following our modular approach, we  
232 improved biomass accumulation by optimizing the accumulated optical density at 600 nm after  
233 24 hours of cultivation.

234 Algorithms for optimizing systems based on multiple dimensions are often sensitive to  
235 initial conditions used (Zakharova & Minashina, 2015). Given this potential confounding effect  
236 here, we tested first the effects of the types of carbon source, nitrogen source, and pH set point  
237 on biomass accumulation, using 1x YNB without amino acids or ammonium sulfate (YNB) to  
238 satisfy minimum requirements for the concentrations of trace elements. We conducted a full-  
239 factorial DOE using glycerol, glucose, and fructose as carbon sources; urea and ammonium  
240 sulfate as nitrogen sources; and potassium phosphate as a buffer with pH values of 5, 5.75, and  
241 6.5. We selected initial concentrations of 40 g/L, 4 g/L urea or the N-mol equivalent for  
242 ammonium sulfate, and 10 g/L potassium phosphate, similar to values used in other media for  
243 *Pichia pastoris* (Matthews et al., 2017a). A least squares regression model, including individual,  
244 combination, and quadratic effects was fit to the log of optical density after 24 hours, a proxy  
245 variable for the average growth rate ( $R^2 = 0.81$ ). We determined that the two most significant  
246 model terms were the type of carbon source and the interaction of the nitrogen source with pH  
247 (**Figure 2A**). We found that cells grew significantly faster on metabolically related sugars  
248 (glucose and fructose) than on the polyol (glycerol) commonly used for *Pichia* during biomass  
249 accumulation (**Figure 2B**). This result affirms prior reports where glucose has been used for  
250 biomass accumulation of *Pichia* (Guo et al., 2012; Moser et al., 2017).

251 The model also suggested that poor biomass accumulation during cultivation resulted  
252 from a combination of ammonium sulfate as a source of nitrogen with low buffer pH (**Figure**  
253 **2B**). This outcome may result from the production of acidic species associated with cellular  
254 ammonium metabolism in the batch cultivation (Villadsen, 2015). Interestingly, the model  
255 indicated slightly greater biomass was achieved with urea instead of ammonium sulfate. The

256 biomass accumulation of cultures grown with urea as a source of nitrogen were less sensitive to  
257 reduced pH values (~5). We observed, however, that cultivations at pH 5 showed extensive  
258 flocculation compared to those at 6.5. Given the insensitivity of urea-fed cultivations to buffer  
259 pH and the high solubility and potential for low-cost sourcing of fructose, we therefore chose to  
260 include fructose, urea, and a potassium phosphate buffer with a pH of 6.5 in our initial media  
261 formulation.

262 With this basal formulation determined, we next screened for concentration-dependent  
263 interactions of other key additives to the media and then optimized concentration-dependent  
264 parameters. Following the same approach for screening effects, we conducted a full factorial  
265 DOE over a broad range of media component concentrations: YNB (0.5, 1, 2x), fructose (10, 30,  
266 50 g/L), urea (1, 4, 7 g/L), and potassium phosphate adjusted to a pH of 6.5 (4, 10, 16 g/L). The  
267 resulting model identified fructose as a concentration-sensitive parameter ( $R^2=0.73$ ) (**Figure**  
268 **2D**). Terms involving the concentration of YNB were also highly ranked, but not statistically  
269 significant. No significant interactions between components were identified in the model. We  
270 therefore sought to better understand the concentration dependence of fructose and YNB  
271 independently (**Figure 2E**), over an 8-fold range of concentrations. As expected, biomass  
272 accumulation was highly sensitive to fructose concentration, with an optimum around 22.5 g/L of  
273 fructose. The concentration of YNB had minimal effect on biomass accumulation; the presence  
274 of trace elements supplied by YNB, however, was essential to growth. Based on these results,  
275 we chose concentrations of 22.5 g/L fructose, 1x YNB, 7 g/L urea, and 10 g/L potassium  
276 phosphate buffer. We reasoned that although biomass accumulation was relatively insensitive  
277 to the concentrations of YNB and urea, higher concentrations could provide improved media  
278 depth in future applications. We named this basal formulation DM1\_dev0.

279 We next assessed what additional media components could improve biomass  
280 accumulation. To test over 60 different components individually would require over 60 individual  
281 solutions. Such an approach would scale linearly with new components; instead, we chose to

282 screen groups of related components, using commercially available pre-mixed supplements. We  
283 compiled a library of 16 commercial supplements and industrially-relevant surfactants containing  
284 more than 60 unique components and screened their individual effect on biomass accumulation  
285 after 24 hours. In this way, we reasoned we could efficiently identify critical classes of  
286 components related to the phenotype of interest and potentially deconvolve specific individual  
287 additives of interest by inference. We used the recommended concentrations of each  
288 supplement as supplied in product information, or critical micelle concentrations, and prior  
289 knowledge for broad classes in yeast media to set reasonable screening concentrations  
290 (Supporting Information). We identified five beneficial and two detrimental supplements that  
291 significantly impacted biomass accumulation ( $p_{\text{adj}} < 0.02$ ; 1-way-ANOVA) (**Figure 2F**). In  
292 general, the results suggest that supplementation with amino acids and trace metals were  
293 beneficial for accumulating biomass, while two surfactants, Tween 20 and CHAPS, were  
294 detrimental. For this phenotype, the effects of vitamin and lipid supplements were minor;  
295 supplements from either supplement category were not significantly beneficial or detrimental to  
296 biomass accumulation. Our earlier experiments suggest that vitamins are essential but  
297 concentration agnostic (**Figure 1E**), while lipid supplementation provides no clear benefit for  
298 biomass accumulation.

299         Based on these results, we chose to test whether combinations of supplements of amino  
300 acids and trace salts could yield synergistic improvements in biomass accumulation. We  
301 screened pairwise combinations of the five beneficial supplements of mixed composition and  
302 ranked the performance of our supplementation strategies (**Figure 2G**). A combination of 1x  
303 MEM amino acids with 0.1 v/v% PTM1 salts resulted in the highest yield of biomass, though we  
304 observed strong performance from other combinations of amino acid and trace metal  
305 supplements. Based on these data, we chose to add MEM amino acids and PTM1 salts in our  
306 basal medium and optimized their concentrations (**Figure 2H**).

307           Based on these results, we elected 0.1 v/v% PTM1 salts and 1x MEM amino acids, in  
308 order to balance the moderate benefits and potentially high costs of amino acids. We found,  
309 however, that the inclusion of the PTM1 salts in liter-scale preparations produced fine  
310 precipitates, which can impede sterile transfers in use. To overcome this challenge, we  
311 screened a broad range of PTM1 salts concentrations to identify the minimum concentration  
312 required for improved outgrowth performance (**Figure 2I**). We found that PTM1 addition at  
313 concentrations as low as 0.0005 v/v% led to increased biomass accumulation. We therefore  
314 revised our PTM1 salts concentration to 0.01 v/v%, a concentration high enough to obtain the  
315 benefits of PTM1 supplementation without inducing precipitate formation. This formulation we  
316 named DM1.

317           Completing this series of optimizations with our iterative modular approach to define a  
318 new formulation of medium, we then compared with other common media used to grow *P.*  
319 *pastoris*. We evaluated the performance of this new optimized medium (DM1) relative to the  
320 unsupplemented basal medium (DM1\_dev0), the rich defined medium (RDM) we had previously  
321 developed, and a common medium 4 v/v% glycerol BMGY. We found that DM1 yielded the  
322 highest biomass accumulation, with significantly higher biomass accumulation relative to RDM  
323 and BMGY (**Figure 2J**). This result demonstrates the utility of our modular strategy here for  
324 media development that yielded an improved formulation for biomass accumulation compared  
325 to other common media with minimal time and labor investment, and without requiring complex  
326 analytical methods like mass spectrometry or RNA-sequencing.

327

328 *Identifying media conditions important to heterologous protein production in K. phaffii*

329           In addition to the time and labor savings of modular media development, our proof-of-  
330 concept experiments demonstrated that this approach creates a flexible medium that can be  
331 rapidly adapted to new growth phenotypes, as well as a data package that identifies media  
332 conditions important to the phenotype of interest. We reasoned that these additional benefits

333 could be particularly relevant for optimizing production of heterologous proteins. Understanding  
334 which media components contribute most significantly to productivity could improve culture  
335 performance and help identify important metabolic pathways or physiological effects for further  
336 study.

337 To develop a medium for improved production of a recombinant protein, we chose to use  
338 a strain engineered to secrete a rotavirus-derived subunit vaccine component, VP4-P[8], as a  
339 model protein. We have previously demonstrated that this viral antigen can be expressed at  
340 high titer under the control of the methanol-inducible pAOX1 promoter in BMMY media (Dalvie  
341 et al., 2020). Similar to our initial approach to optimize a medium for growing biomass, we first  
342 determined and optimized the concentrations of the sources for carbon and nitrogen, along with  
343 the pH. The expression of P[8] in the strain tested uses the methanol-dependent pAOX1  
344 promoter for inducible expression, so we selected methanol as the initial carbon source. We  
345 then examined the impact of the source of nitrogen and buffer pH on titer. We conducted a full-  
346 factorial DOE using identical concentrations as those used to create a medium for accumulating  
347 biomass. The resulting model was visualized by ranking combinations of sources of nitrogen  
348 and buffer (**Figure 3A**). The effects showed no interaction between these two factors. Urea was  
349 again identified as the preferred source of nitrogen while higher pH values led to improved  
350 secreted P[8] productivity. Unlike biomass accumulation, this pH dependence was observed  
351 across both nitrogen sources.

352 We next applied the same DOE to identify important concentration-dependent  
353 interactions that impact the production of P[8]. Unsurprisingly, the concentration of methanol  
354 was the most important factor, with possible minor effects from other components (**Figure 3B**).  
355 We decided to screen further a 20-fold range in methanol concentrations using two formulations  
356 for remaining media components—the one determined for optimal cell growth (DM1) and the  
357 optimal base media formulation predicted by the quadratic model here (2x YNB, 1 g/L urea, 4  
358 g/L potassium phosphate adjusted to a pH of 6.5). We found that production was relatively

359 insensitive for concentrations of methanol ranging from 1-4 v/v%, with an optimum around 2%  
360 (**Figure 3C**). We postulated that the rapid decline in productivity observed in these milliliter-  
361 scale cultures using concentrations >6 v/v% methanol was likely due to excess formation of  
362 toxic metabolic byproducts such as formaldehyde and hydrogen peroxide (Wakayama et al.,  
363 2016). Interestingly, the predicted optimal medium from this set of studies outperformed the  
364 medium we determined for accumulating biomass, suggesting that certain components of the  
365 basal medium may benefit protein expression more than cellular growth and underscores the  
366 value of optimizing media for specific phenotypes of interest. Based on these data in total, we  
367 defined a basal medium for production including 2x YNB, 2 v/v% methanol, 1 g/L urea, and 4  
368 g/L potassium phosphate buffer adjusted to a pH of 6.5 (DM2\_dev0).

369         Next, we examined which supplements could improve the performance of DM2\_dev0.  
370 We added three chemical chaperones (TUDCA, sodium deoxycholate monohydrate (SDM), and  
371 valproic acid) (Kuryatov, Mukherjee, & Lindstrom, 2013; Uppala, Gani, & Ramaiah, 2017), two  
372 antioxidants (reduced glutathione (GSH) and N-acetyl cysteine (NAC)), and the chelator, K-  
373 ETDA, to the list of 16 supplements included in our original screen defined for biomass  
374 accumulation. Concentrations for these components were chosen based on product  
375 specifications, literature data, and prior experience (Supporting Information). Many of the 22  
376 supplements screened improved production of P[8] (**Figure 3D**). The top four ranking  
377 supplements comprised surfactants or lipids, which could modulate membrane fluidity and lipid  
378 metabolism (Butler, Huzel, Barnab, Gray, & Bajno, 1999; Degreif, Cucu, Budin, Thiel, & Bertl,  
379 2019; Ritacco, Frank V; Yongqi Wu, 2018).

380         We then screened combinations of lipid supplements and surfactants to identify potential  
381 synergistic effects. We ranked the individual supplements and their combinations (**Figure 3E**)  
382 according to the measured titers of P[8]. We found that the addition of a cholesterol-rich  
383 supplement yielded the highest secreted titers of P[8] (~50% improvement compared with  
384 supplement-free condition in initial screens). Interestingly, a synthetic cholesterol supplement



385 alone did not substantially improve performance, suggesting the benefit results from a  
386 combination of fatty acids and surfactant components in the supplement (**Supporting**  
387 **Information**). This conclusion is consistent with similar improvements observed from other  
388 supplements, such as linoleic acid-oleic acid-albumin (**Figure 3D**).

389         Since no other synergistic effects were observed in the combination screen, we  
390 assessed the dependence of titer on the concentration of the cholesterol-containing supplement  
391 identified (**Figure 3F**). Similar to our observations with cellular YNB used in the outgrowth  
392 media, we found that concentrations of the supplement as low as 0.2 v/v% were beneficial for  
393 protein expression, but that production was relatively insensitive to concentration (**Figures 3F,**  
394 **3G**). We then directly compared the supplemented medium to the original composition; the new  
395 supplemented media provided a 25% improvement in titer ( $p = 0.0006$ , one-tailed Welch's T  
396 test). This new formulation with 1x cholesterol supplement, which we named DM2\_dev1, was  
397 the result of one cycle of optimization using our method.

398         Components of the cholesterol supplement included fatty acids, cholesterol, and  
399 cyclodextrin, which are all are known to modulate membrane fluidity, a key parameter in vesicle  
400 trafficking (Cooper, 1978; Degreif et al., 2019; Mahammad & Parmryd, 2015). We reasoned that  
401 the addition of this supplement could therefore have synergistic effects with other supplements,  
402 but did not find any further supplementation that improved P[8] titers within our original screen  
403 (**Figure 3H**). We, therefore, considered if there could be additional classes of beneficial  
404 supplements, absent from the original screen. Previous experiments demonstrated that P[8]  
405 productivity is highly sensitive to methanol concentration (**Figure 3C**), so we wondered whether  
406 further modulation of central carbon metabolism could yield additional productivity gains.

407         Modification of central carbon metabolism is best accomplished by feeding cells  
408 alternative carbon sources, either entirely or as co-feeding substrates. Four co-fed substrates  
409 have previously been shown to be non-repressive of pAOX1: sorbitol, mannitol, trehalose, and  
410 alanine (Inan & Meagher, 2001). These substrates can be co-utilized with methanol without



411 repressing the pAOX1 promoter, which controls expression of P[8]. We hypothesized that the  
412 introduction of supplemental carbon sources could enable further optimization of central carbon  
413 metabolism. We screened co-fed substrates individually and in 1:1 combinations at a total  
414 concentration of 20 g/L (a concentration similar to the optimal fructose and methanol  
415 concentrations observed in previous carbon source optimizations) (**Figure 2E,3C**). Sorbitol co-  
416 feeding had the most beneficial effect, resulting in a ~80% increase in P[8] titer (**Figure 3I**).  
417 Mannitol supplementation was also beneficial (~70% increase), while alanine and trehalose co-  
418 feeding were detrimental to productivity. While co-feeding carbon sources led to increased  
419 biomass yield during production, these differences did not account for the improved titer, as  
420 improvements in specific productivity ( $q_p$ ) of ~60% and ~45% were also observed for the sorbitol  
421 and mannitol co-fed conditions, respectively (**Supporting Information**). Based on these data,  
422 we chose to include sorbitol as a supplemental carbon source for further study.

423         The addition of a supplemental carbon source could significantly impact central carbon  
424 metabolism. We, therefore, wondered how the inclusion of sorbitol might impact the optimal  
425 carbon feeding strategy. Examining total carbon source concentrations from 20 – 70 g/L, we  
426 compared the performance of cultures co-fed with sorbitol:methanol ratios of 3:1, 1:1, and 1:3 to  
427 a methanol-only control (**Figure 3J**). All co-fed conditions outperformed the methanol-only  
428 control, suggesting that the presence of sorbitol is highly beneficial for producing P[8]. The titer  
429 was relatively insensitive to sorbitol:methanol ratios and carbon concentrations. Based on the  
430 data, we decided to use 2 v/v% methanol and 20 g/L of sorbitol for the final sorbitol-  
431 supplemented media named DM2.

432         Finally, we compared the P[8] titer obtained using DM2\_dev0, DM2\_dev1, and DM2 to  
433 other common production media for *P. pastoris*: BMMY and RDM. We found that DM2 led to a  
434 ~2x improvement in P[8] titers, relative to BMMY and RDM, up to  $97 \pm 2$  mg/L.

435

436 **Discussion**

437           Here we have implemented a novel and broadly applicable approach for media  
438 development that relies on rapid, automated construction of diverse media from defined  
439 modules of components. We demonstrated the utility of this approach by developing two new  
440 media for two phenotypes of interest in the heterologous production of proteins by yeast,  
441 namely biomass accumulation and secreted production. We systematically identified and  
442 optimized the concentration of media components important to each phenotype of interest.  
443 Importantly, defining these new formulations of media did not require advanced analytical  
444 capabilities and required minimal experimental time to assess more than 360 total formulations  
445 during two to three rounds of optimization for each.

446           Our optimized formulations affirmed the importance of lipid-related components for  
447 maximizing titers in *Pichia pastoris* cultivations. The importance of optimizing membrane fluidity  
448 or lipid metabolism has been well established in CHO and appears to be key to optimizing  
449 heterologous protein secretion in *P. pastoris* cultivation as well (Clincke et al., n.d.; Ritacco et  
450 al., 2018; Zhang, Wang, & Liu, 2013).

451           Modular media blending has four advantages over existing methods. First, the use of  
452 common stock solutions and supplements to formulate media reduces initial labor required for  
453 new experiments or optimizations ~15 minutes per experiment, making parallel testing of  
454 multiple hypotheses efficient and requires less resources overall. Here, we created 30 stock  
455 solutions, and evaluated >360 unique media compositions, without manual preparation of  
456 individual media or extensive blending calculations or planning. Most of these solutions could be  
457 readily reused in future experiments to optimize for new phenotypes of interest. Second, our  
458 method requires minimal knowledge of the host organism *a priori* and could, in principle, be  
459 applied to any measurable phenotype of interest. We anticipate that this method could be used  
460 to optimize other phenotypes of interest, such as glycosylation profiles. Third, our method  
461 provides certain practical advantages, including minimal requirements for analytical  
462 characterization and rapid identification of component interactions that lead to solubility

463 challenges. These traits make it possible to learn about formulations that may lead to extensive  
464 precipitates like those encountered with our rich defined medium formulation (**Figure 4A**).  
465 Finally, modularly constructed media, such as DM2, can be ~70% pure water with low  
466 osmolarity, leaving volumetric and osmotic space for future modifications to accommodate new  
467 or related phenotypes of interest (**Figure 4B**).

468 We also acknowledge certain limitations in the present study that may be addressed in  
469 future work. First, while modular media development identifies components key to the  
470 optimization of the phenotype of interest, additional media optimization effort may be necessary  
471 to translate these learning in batch cultivations to scaled-up fed-batch or perfusion operation,  
472 where additional variables such as supplemental feed composition and feeding schedule must  
473 also be considered. In principle, modular media construction could be applied to high-  
474 throughput scale-down cultivation models, such as Ambr250s. Second, our approach for  
475 optimization relies on greedy algorithms tailored to create a new media for a single phenotype of  
476 interest; however, given the vast explorable media space it is possible to find a local optimum.  
477 Further metabolic or -omic modeling techniques could be employed to guide broader exploration  
478 of media space, co-optimize multiple phenotypes, or facilitate biologically informed optimization,  
479 albeit with more complex experimental and computational requirements (Matthews, Kuo, Love,  
480 & Love, 2017b; Mohmad-Saberi et al., 2013). Third, our current method used commercially  
481 available supplements, but in practice, beneficial supplements could be simplified by using  
482 individual components, to facilitate more biological inferences and aid development of improved  
483 host-specific supplements. Finally, initial screens to identify beneficial supplements rely on  
484 reasonable choices of initial concentrations for screening. These currently require prior  
485 knowledge from the literature or commercial sources; with further use in the community of the  
486 Openblend approach, it is possible additional sharing of knowledge could help inform further  
487 developments.

488           The improved speed and accessibility of in-depth media development experiments  
489 enabled by modular media construction could help improve expression of many classes of  
490 proteins in laboratories and discovery centers that have not traditionally had access to such  
491 capabilities. Since many lead candidates for new therapeutic proteins begin in small biotech  
492 firms and academic labs, early-stage improvements in productivity could help advance more  
493 proteins towards the clinic simply by facilitating access to larger quantities of proteins for initial  
494 research and non-clinical studies. In more established companies, the ability to make rapid  
495 improvements to existing media may enable faster product development timelines and could  
496 reduce manufacturing costs overall. Rapid identification and optimization of sensitive media  
497 components could also enable easier adoption of a range of industrially relevant alternative  
498 hosts, resulting in further manufacturing flexibility and potentially cost savings (Coleman, 2020).

499

## 500 **Acknowledgements**

501           The authors acknowledge Danielle Camp for program coordination. This work was  
502 funded by the Bill & Melinda Gates Foundation (Investment ID INV-002740). The content is  
503 solely the responsibility of the authors and does not necessarily represent the official views of  
504 the Bill & Melinda Gates Foundation.

505           A.M.B., I.R.G., K.R.L., and J.C.L. conceived and planned experiments. A.M.B.  
506 conducted media development experiments. S.R.A. developed and maintained the RP-UPLC  
507 assay. A.M.B. performed analytical characterization. A.M.B., K.R.L., and J.C.L. wrote the  
508 manuscript. J.C.L. and K.R.L. designed the experimental strategy and supervised analysis. All  
509 authors reviewed the manuscript.

510

511

## 512 References

- 513
- 514 Butler, M., Huzel, N., Barnab, N., Gray, T., & Bajno, L. (1999). Linoleic acid improves the  
515 robustness of cells in agitated cultures, 27–36.
- 516 Clincke, M.-F., Guedon, E., Yen, F. T., Ea, L., Universite, N., Ogier, V., ... Goergen, J.-L. (n.d.).  
517 Effect of Surfactant Pluronic F-68 on CHO Cell Growth , Metabolism , Production , and  
518 Glycosylation of Human Recombinant IFN- c in Mild Operating Conditions, 181–190.  
519 <https://doi.org/10.1002/btpr.503>
- 520 Coleman, E. (2020). Establishment of a Novel Pichia Pastoris Host Production Platform by.  
521 Combs, G. F. (2012). *The vitamins: Fundamental aspects in nutrition and health*. San Diego:  
522 Elsevier Academic Press.
- 523 Cooper, R. A. (1978). Influence of Increased Membrane Cholesterol on Membrane Fluidity and  
524 Cell Function in Human Red Blood Cells. *Journal of Supramolecular Structure*.
- 525 Crowell, L. E., Crowell, L. E., Raymond, A., St, H. E., Engineering, C., Doyle, P. S., & Crowell,  
526 L. E. (2020). Accelerating process development for biologics on an automated , pharmacy-  
527 scale manufacturing system by by.
- 528 Dalvie, N. C., Brady, J. R., Crowell, L. E., Tracey, M. K., Biedermann, A. M., Kaur, K., ... Love,  
529 J. C. (2020). Molecular engineering improves antigen quality and enables integrated  
530 manufacturing of a trivalent subunit vaccine candidate for rotavirus. *BioRx*, 1–51.
- 531 Degreif, D., Cucu, B., Budin, I., Thiel, G., & Bertl, A. (2019). Lipid determinants of endocytosis  
532 and exocytosis in budding yeast. *BBA - Molecular and Cell Biology of Lipids*, 1864(7),  
533 1005–1016. <https://doi.org/10.1016/j.bbalip.2019.03.007>
- 534 FSA Panel on Additives and Products or Substances used in Animal Feed (FEEDAP). (2011).  
535 Scientific Opinion on safety and efficacy of choline chloride as a feed additive for all animal  
536 species. *EFSA Journal*, 9(9), 2353.
- 537 Gagnon, M., Hiller, G., Luan, Y. T., Kittredge, A., Defelice, J., & Drapeau, D. (2011). High-End  
538 pH-controlled delivery of glucose effectively suppresses lactate accumulation in CHO Fed-  
539 batch cultures. *Biotechnology and Bioengineering*, 108(6), 1328–1337.  
540 <https://doi.org/10.1002/bit.23072>
- 541 Galbraith, S. C., Bhatia, H., Liu, H., & Yoon, S. (2018). Media formulation optimization: current  
542 and future opportunities. *Current Opinion in Chemical Engineering*, 22, 42–47.  
543 <https://doi.org/10.1016/j.coche.2018.08.004>
- 544 Guo, C., Huang, Y., Zheng, H., Tang, L., He, J., Xiang, L., ... Jiang, H. (2012). Secretion and  
545 activity of antimicrobial peptide cecropin D expressed in Pichia pastoris. *Experimental and  
546 Therapeutic Medicine*, 1063–1068. <https://doi.org/10.3892/etm.2012.719>
- 547 Inan, M., & Meagher, M. M. (2001). Non-repressing carbon sources for alcohol oxidase (AOX1)  
548 Promoter of Pichia pastoris, 92(6), 585–589.
- 549 Jordan, M., Voisard, D., Berthoud, A., & Tercier, L. (2013). Cell culture medium improvement by  
550 rigorous shuffling of components using media blending, 31–40.  
551 <https://doi.org/10.1007/s10616-012-9462-1>
- 552 Kennedy, M., & Krouse, D. (1999). Strategies for improving fermentation medium performance:  
553 a review. *Journal of Industrial Microbiology and Biotechnology*, (23), 456–475.
- 554 Kuryatov, A., Mukherjee, J., & Lindstrom, J. (2013). Chemical Chaperones Exceed the  
555 Chaperone Effects of RIC-3 in Promoting Assembly of Functional a 7 AChRs. *PLoS ONE*,  
556 8(4), 1–11. <https://doi.org/10.1371/journal.pone.0062246>
- 557 Loebrich, S., Clark, E., Ladd, K., Takahashi, S., Brousseau, A., Kitchener, S., ... Ryll, T. (2019).  
558 Comprehensive manipulation of glycosylation profiles across development scales. *MAbs*,  
559 11(2), 335–349. <https://doi.org/10.1080/19420862.2018.1527665>
- 560 Love, J. C., Love, K. R., & Barone, P. W. (2012). Enabling global access to high-quality  
561 biopharmaceuticals. *Current Opinion in Chemical Engineering*, 2(4), 383–390.  
562 <https://doi.org/10.1016/j.coche.2013.09.002>

- 563 Lu, T. L., Pugach, O., Somerville, R., Rosenberg, S. A., Kochenderfer, J. N., Better, M., &  
564 Feldman, S. A. (2016). A Rapid Cell Expansion Process for Production of Engineered  
565 Autologous CAR-T Cell Therapies. *Human Gene Therapy Methods*, 27(6), 209–219.  
566 <https://doi.org/10.1089/hgtb.2016.120>
- 567 Mahammad, S., & Parmryd, I. (2015). Cholesterol depletion using methyl- $\beta$ -cyclodextrin. In  
568 *Methods in membrane lipids* (pp. 91–102).
- 569 Matthews, C. B., Kuo, A., Love, K. R., & Love, J. C. (2017a). Development of a general defined  
570 medium for *Pichia pastoris*, (July), 103–113. <https://doi.org/10.1002/bit.26440>
- 571 Matthews, C. B., Kuo, A., Love, K. R., & Love, J. C. (2017b). Development of a general defined  
572 medium for *Pichia pastoris*, (July), 103–113. <https://doi.org/10.1002/bit.26440>
- 573 McGillicuddy, N., Floris, P., Albrecht, S., & Bones, J. (2018). Examining the sources of variability  
574 in cell culture media used for biopharmaceutical production. *Biotechnology Letters*, 40(1),  
575 5–21. <https://doi.org/10.1007/s10529-017-2437-8>
- 576 Mohmad-Saberi, S. E., Hashim, Y. Z. H. Y., Mel, M., Amid, A., Ahmad-Raus, R., & Packer-  
577 Mohamed, V. (2013). Metabolomics profiling of extracellular metabolites in CHO-K1 cells  
578 cultured in different types of growth media. *Cytotechnology*, 65(4), 577–586.  
579 <https://doi.org/10.1007/s10616-012-9508-4>
- 580 Moser, J. W., Prielhofer, R., Gerner, S. M., Graf, A. B., Wilson, I. B. H., Mattanovich, D., &  
581 Dragosits, M. (2017). Implications of evolutionary engineering for growth and recombinant  
582 protein production in methanol - based growth media in the yeast *Pichia pastoris*. *Microbial*  
583 *Cell Factories*, 1–16. <https://doi.org/10.1186/s12934-017-0661-5>
- 584 Pereira, S., Kildegaard, H. F., & Andersen, M. R. (2018). Impact of CHO Metabolism on Cell  
585 Growth and Protein Production: An Overview of Toxic and Inhibiting Metabolites and  
586 Nutrients. *Biotechnology Journal*, 13(3), 1–13. <https://doi.org/10.1002/biot.201700499>
- 587 Ritacco, Frank V; Yongqi Wu, A. K. (2018). Cell Culture Media for Recombinant Protein  
588 Expression in Chinese Hamster Ovary ( CHO ) Cells : History , Key Components , and  
589 Optimization Strategies. <https://doi.org/10.1002/btpr.2706>
- 590 Ritacco, F. V., Wu, Y., & Khetan, A. (2018). Cell culture media for recombinant protein  
591 expression in Chinese hamster ovary (CHO) cells: History, key components, and  
592 optimization strategies. *Biotechnology Progress*, 34(6), 1407–1426.  
593 <https://doi.org/10.1002/btpr.2706>
- 594 Rodrigues, M. E., Costa, A. R., Henriques, M., Azeredo, J., & Oliveira, R. (2012). Comparison of  
595 commercial serum-free media for CHO-K1 cell growth and monoclonal antibody  
596 production. *International Journal of Pharmaceutics*, 437(1–2), 303–305.  
597 <https://doi.org/10.1016/j.ijpharm.2012.08.002>
- 598 Rouiller, Y., Périlleux, A., Collet, N., Jordan, M., Stettler, M., & Broly, H. (2013). A high-  
599 throughput media design approach for high performance mammalian fed-batch cultures,  
600 (June), 501–511.
- 601 Schnellbaecher, A., Binder, D., Bellmaine, S., & Zimmer, A. (2019). Vitamins in cell culture  
602 media: Stability and stabilization strategies. *Biotechnology and Bioengineering*, 116(6),  
603 1537–1555. <https://doi.org/10.1002/bit.26942>
- 604 Sorkun, M. C., Khetan, A., & Er, S. (2019). AqSolDB , a curated reference set of aqueous  
605 solubility and 2D descriptors for a diverse set of compounds, 2019(July), 1–8.  
606 <https://doi.org/10.1038/s41597-019-0151-1>
- 607 Uppala, J. K., Gani, A. R., & Ramaiah, K. V. A. (2017). Chemical chaperone , TUDCA unlike  
608 PBA , mitigates protein aggregation efficiently and resists ER and non-ER stress induced  
609 HepG2 cell death. *Scientific*, 1(January), 1–13. [https://doi.org/10.1038/s41598-017-03940-](https://doi.org/10.1038/s41598-017-03940-1)  
610 1
- 611 Villadsen, J. (2015). Redox Balances and Consistency Check of Experiments. In *Fundamental*  
612 *Bioengineering* (pp. 17–38).
- 613 Wakayama, K., Yamaguchi, S., Takeuchi, A., Mizumura, T., Ozawa, S., Tomizuka, N., ...



- 614 Nakagawa, T. (2016). Regulation of intracellular formaldehyde toxicity during methanol  
615 metabolism of the methylotrophic yeast *Pichia methanolica*. *Journal of Bioscience and*  
616 *Bioengineering*, 122(5), 545–549. <https://doi.org/10.1016/j.jbiosc.2016.03.022>  
617 Yamamoto, T., & Ishihara, K. (n.d.). Stability of Glutathione in Solution. *Developments in Food*  
618 *Engineering*, 209–211.  
619 Zakharova, E. M., & Minashina, I. K. (2015). Review of Multidimensional Optimization Methods.  
620 *Mathematical Models, Computational Methods*, 60(6), 625–636.  
621 <https://doi.org/10.1134/S1064226915060194>  
622 Zhang, H., Wang, H., & Liu, M. (2013). Rational development of a serum-free medium and fed-  
623 batch process for a GS-CHO cell line expressing recombinant antibody, 363–378.  
624 <https://doi.org/10.1007/s10616-012-9488-4>  
625  
626

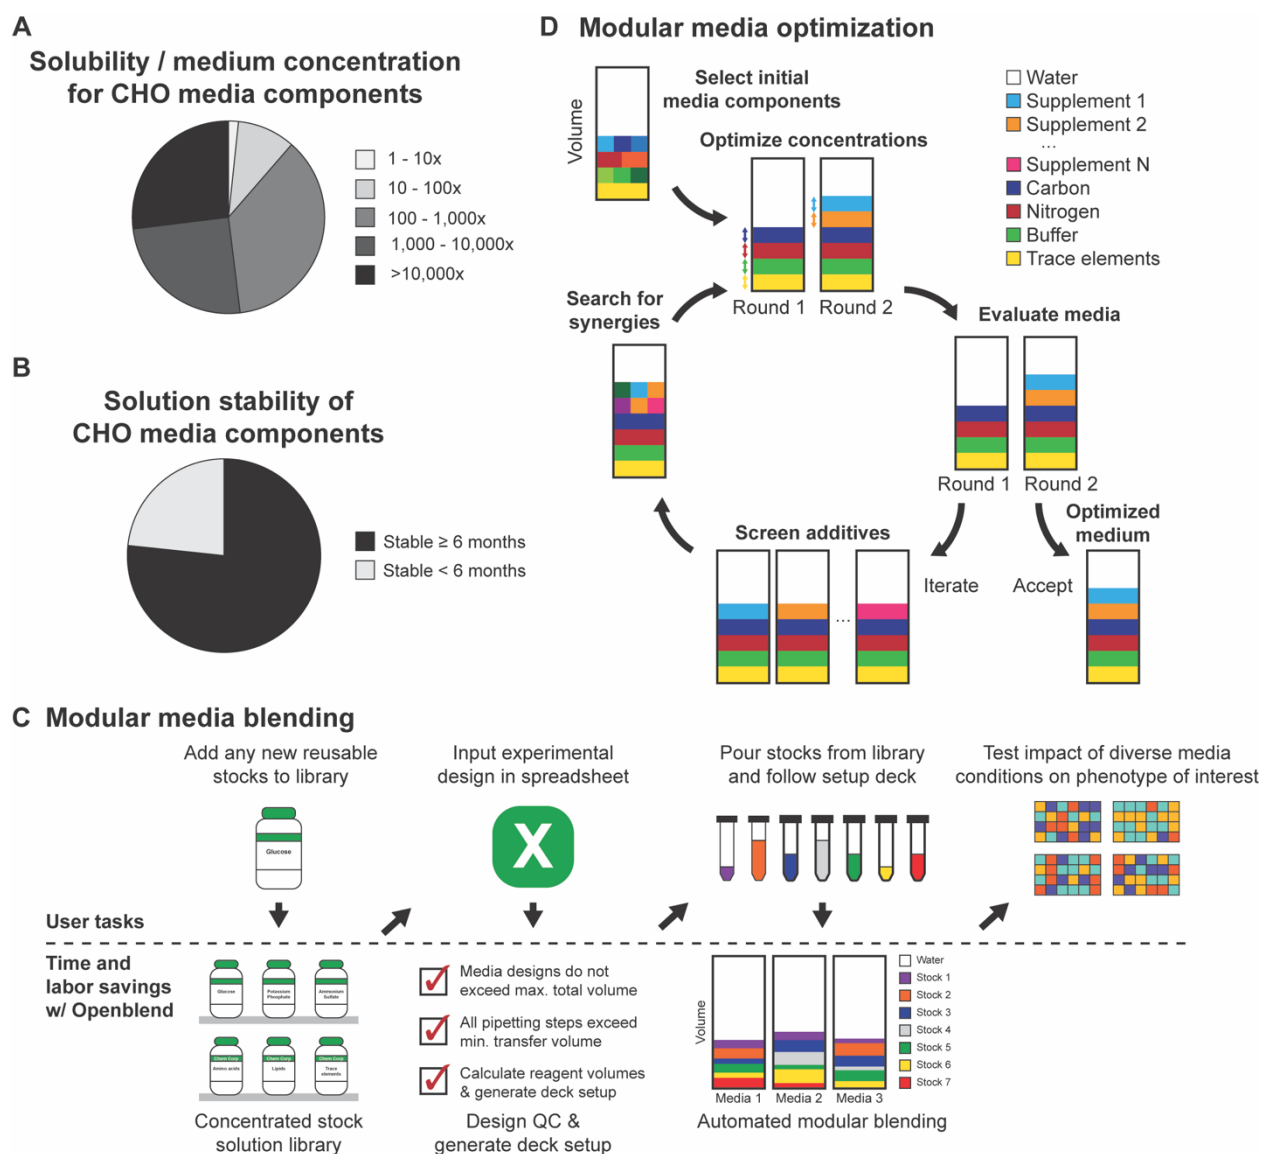

627

628 **Figure 1.** Modular media development can be broadly applicable, easily applied, and

629 systematically executed to improve measurable phenotypes of interest.

630 A) Estimate of the ratios of component solubility to their concentrations in medium demonstrates

631 that most components are soluble at  $>10x$  their concentration in the CHO medium, eRDF. B)

632 With the exception of some classes of medium components, such as vitamins, most media

633 components can be formulated into solutions that remain stable for  $>6$  months under proper

634 storage conditions. C) Overview of time, labor and planning saved by using Openblend to

635 automate modular media construction. D) Overview of a modular media optimization approach,



636 which can be used to build an optimized medium for any measurable phenotype of interest

637 systematically.

638

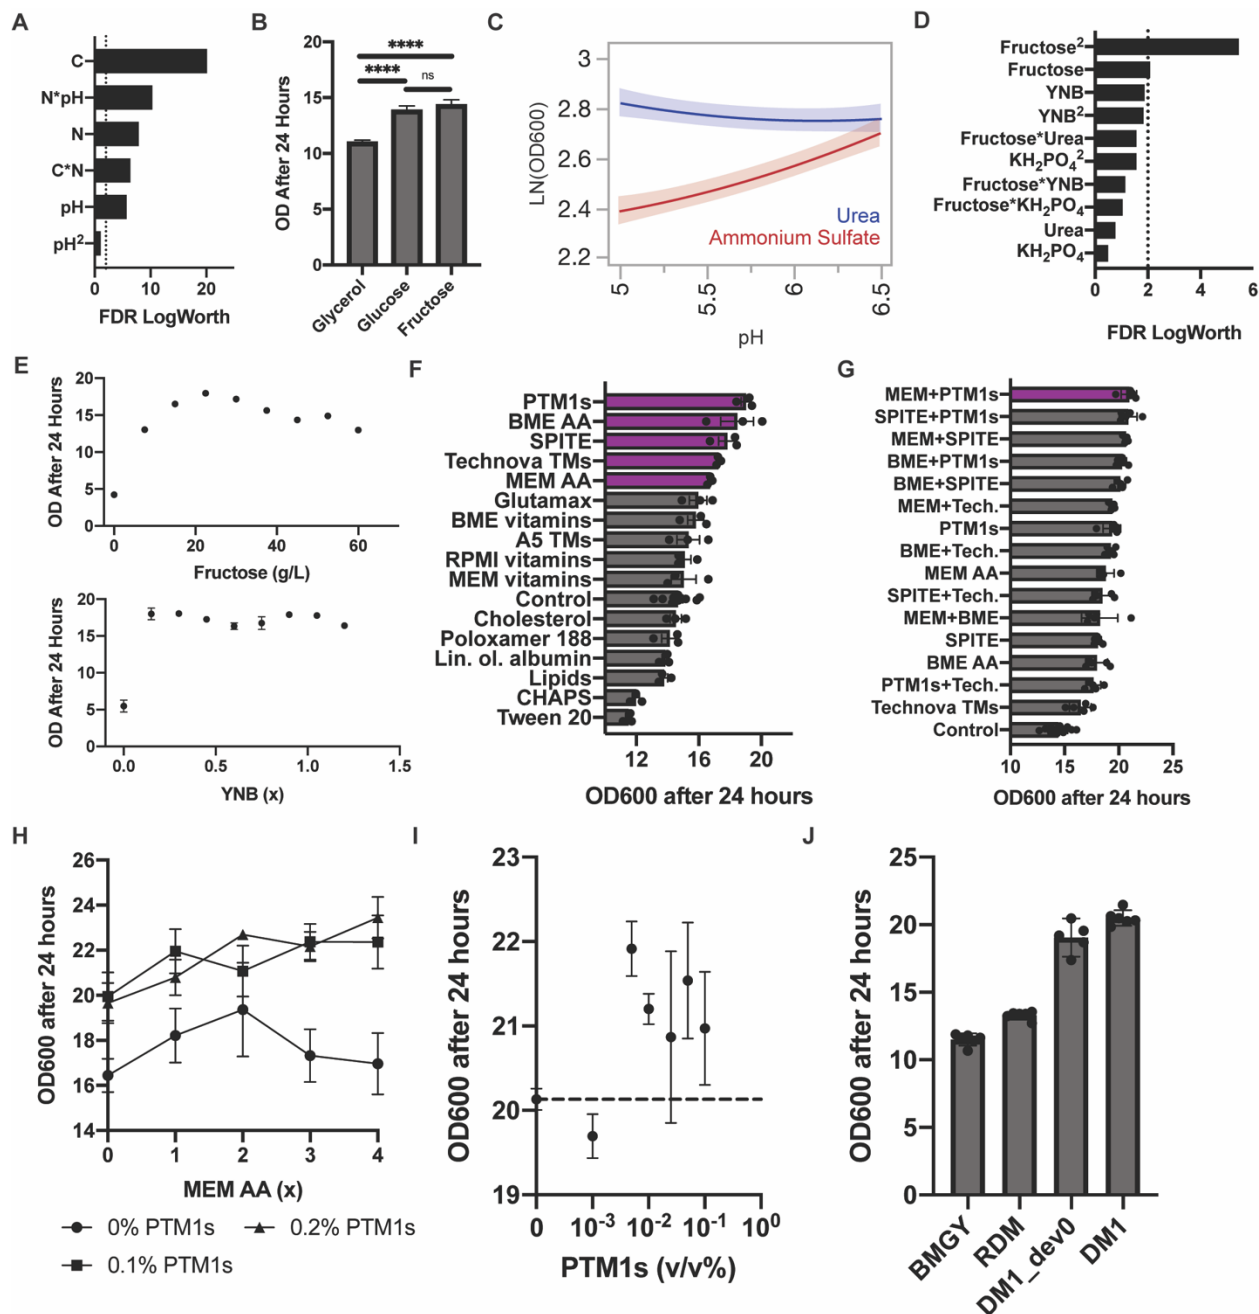

639

640 **Figure 2.** Modular development of a new biomass accumulation media for *P. pastoris*

641 A) Significance of carbon (fructose, glucose, glycerol), nitrogen (urea and ammonium sulfate),

642 and pH choice (5, 5.75, 6.5) in a least square regression model fitted to a full factorial DOE. B)

643 Fructose and glucose were found to result in significantly higher biomass accumulation after 24

644 hours of outgrowth than glycerol. C) Ammonium sulfate was found to be more pH sensitive than  
645 urea, as shown by the JMP sensitivity profiles during fructose feeding. D) Significance of terms  
646 in a least square regression model fitted to a full factorial DOE over fructose, urea, potassium  
647 phosphate, and YNB concentrations. E) 1-FAAT optimization of fructose and YNB concentration  
648 finds optimal outgrowth performance at a fructose concentration of 22.5 g/L and relative  
649 insensitivity over a wide range of YNB concentrations (0.15 to 1.2x). F) A media  
650 supplementation screen identified 5 beneficial supplements, related to trace element and amino  
651 acid supplementation. G) Further screening of beneficial supplement combinations identified  
652 synergistic amino acid and trace metal supplementation strategies. H) Comparison of the effect  
653 of MEM amino acid concentration on biomass accumulation at different PTM1 salts  
654 concentrations. I) Effect of the concentration of PTM1 salts on biomass accumulation in  
655 DM1\_dev0 medium supplemented with 1x MEM AA. J) Head-to-head comparison of 4 v/v%  
656 glycerol BMGY, 4 v/v% glycerol rich defined medium, the initial defined biomass accumulation  
657 media (DM1\_dev0), and the final biomass accumulation medium obtained after a full  
658 optimization cycle (DM1), demonstrates that DM1 leads to superior biomass accumulation.

659

660

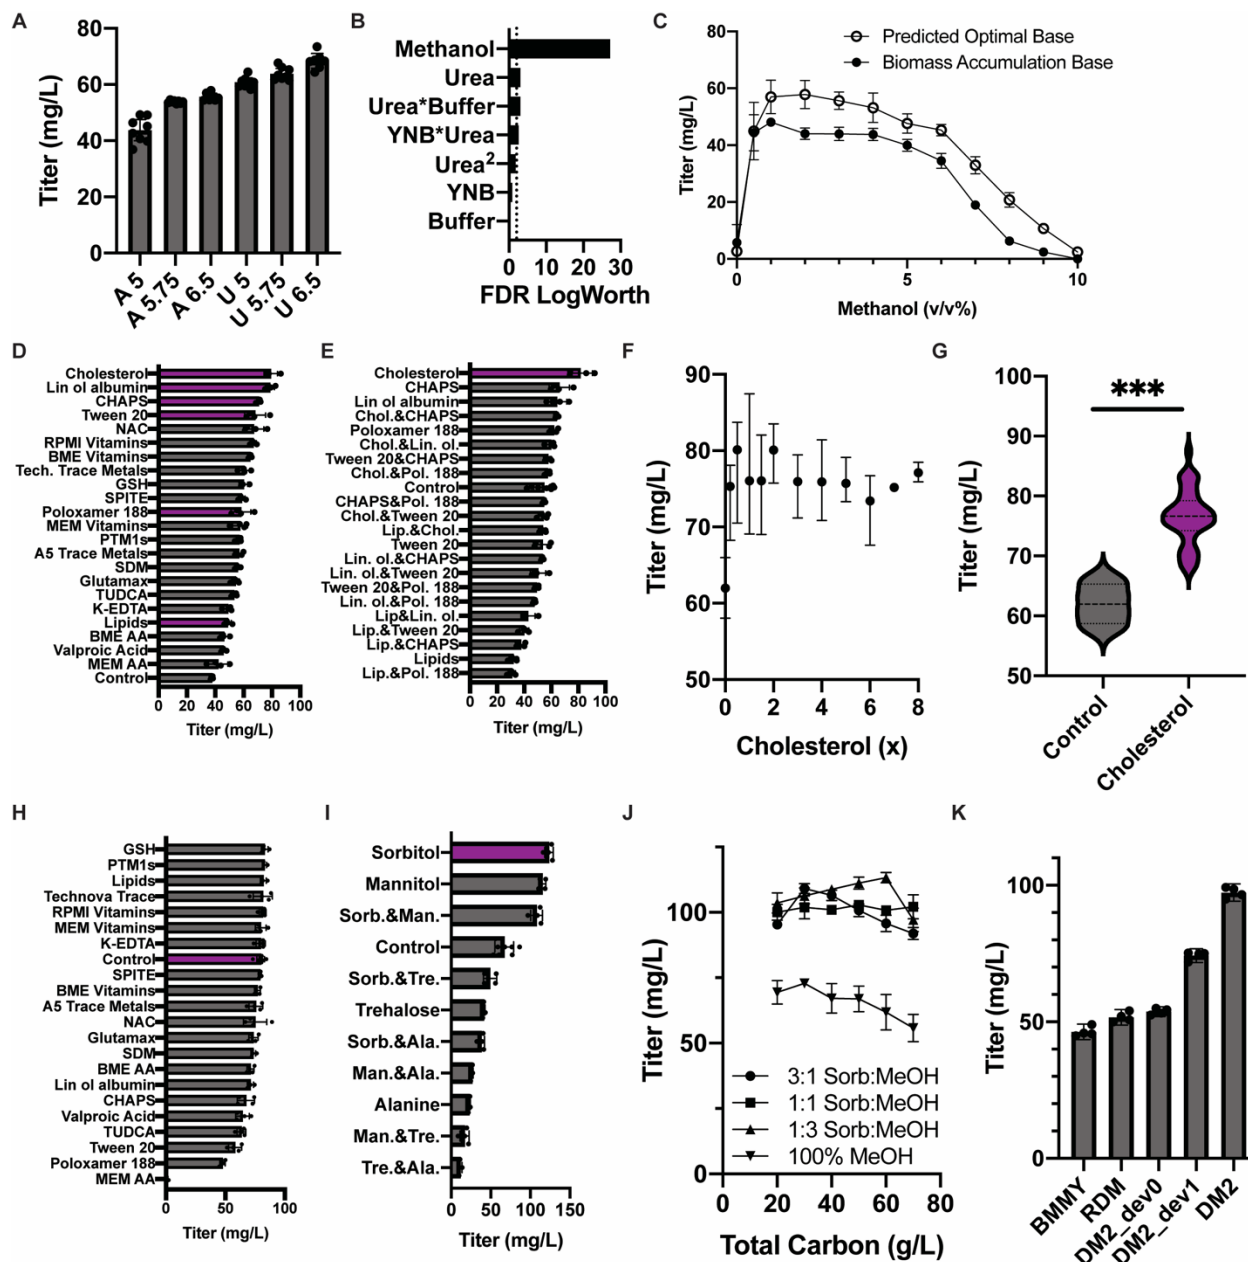

661 **Figure 3.** Modular development of a media for heterologous protein production in *P. pastoris*  
 662

663 A) Initial full-factorial screen of nitrogen source choice and buffer pH demonstrates that urea is  
 664 preferred over ammonium sulfates and high buffer pH is preferred over lower values. B) A full-  
 665 factorial concentration optimization identified methanol as the most concentration dependent  
 666 variable. Other components in the base media were predicted to affect productivity with much  
 667 lower levels of significance. C) Evaluation of the effect of methanol concentration on P[8] titer,  
 668 using two different base media (urea, buffer, and YNB concentrations): the biomass

669 accumulation base medium and the optimal base media composition predicted by our  
670 concentration DOE. D) Ranking of supplements according to their effect on P[8] titer.  
671 Supplements related to membrane fluidity or lipid metabolism ranked highly. E) Evaluation of  
672 combinations of lipid and surfactant supplements confirmed that cholesterol supplementation  
673 leads to the greatest improvement in P[8] titer. F) Concentration optimization of cholesterol  
674 demonstrated low concentration dependence, with similar performance observed over a 40-fold  
675 range (0.2-8x). G) Comparing cholesterol-free and cholesterol-supplemented cultures fed at  
676 various concentrations demonstrates that cholesterol supplementation results in a significant  
677 ~25% improvement in P[8] titers ( $p < 0.001$ ). H) No significantly beneficial supplements were  
678 observed when repeating the supplementation screen. I) Screening supplementation of 20 g/L  
679 of co-fed substrates individually or in 1:1 combinations by mass identified sorbitol  
680 supplementation as highly beneficial to P[8] titer. J) Examination of the effect of co-feed ratio  
681 and total carbon concentration on titer in DM2\_dev1 supplemented media. K) Comparison of  
682 P[8] titer obtained with DM2 to previous iterations and other common *P. pastoris* media  
683 demonstrates a ~2x improvement in P[8] titer, relative to 1 v/v% methanol RDM and 1 v/v%  
684 methanol BMMY.  
685

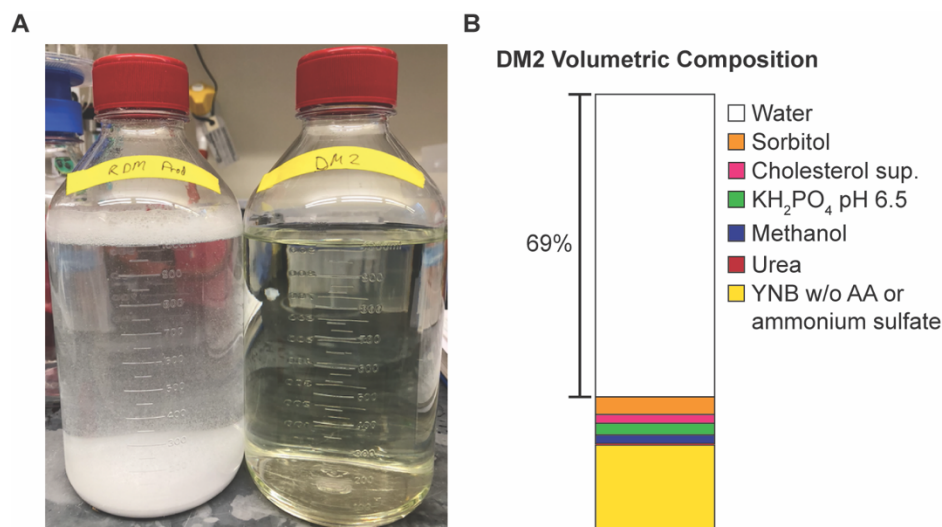

686

687 **Figure 4.** Comparison of DM2 to rich define medium.

688 A) Comparison of precipitate formation during construction of RDM (left) and DM2 (right) media.

689 Adjusting the pH of RDM to 6.5 results in significant formation of white precipitate. No

690 precipitate formation is observed in DM2. B) Relative volumes of stock solutions and pure water

691 needed to construct DM2. Pure water addition accounts for 69% of DM2 volume, demonstrating

692 that there is substantial room for further supplement exploration and development. When

693 separated into simple stock solutions, DM2 can be 3x concentrated.
